# Supplementary figures and images for: The oxygen delivery response to acute hypoxia during incremental knee extension exercise differs in active and trained males
Source: Springer Nature journal article supplement (doi:10.1186/1476-5918-7-11), 2008-08-12

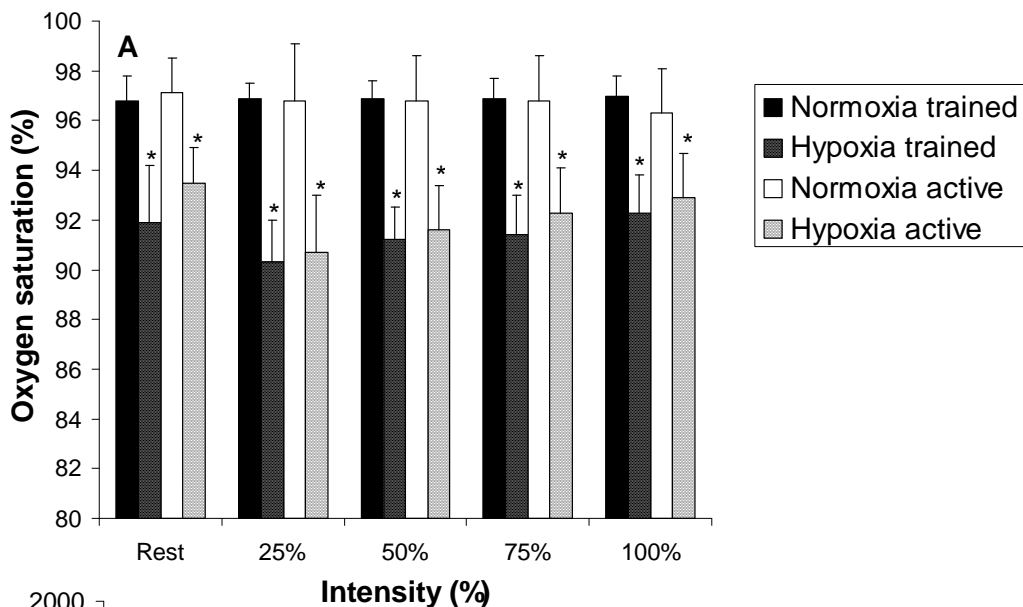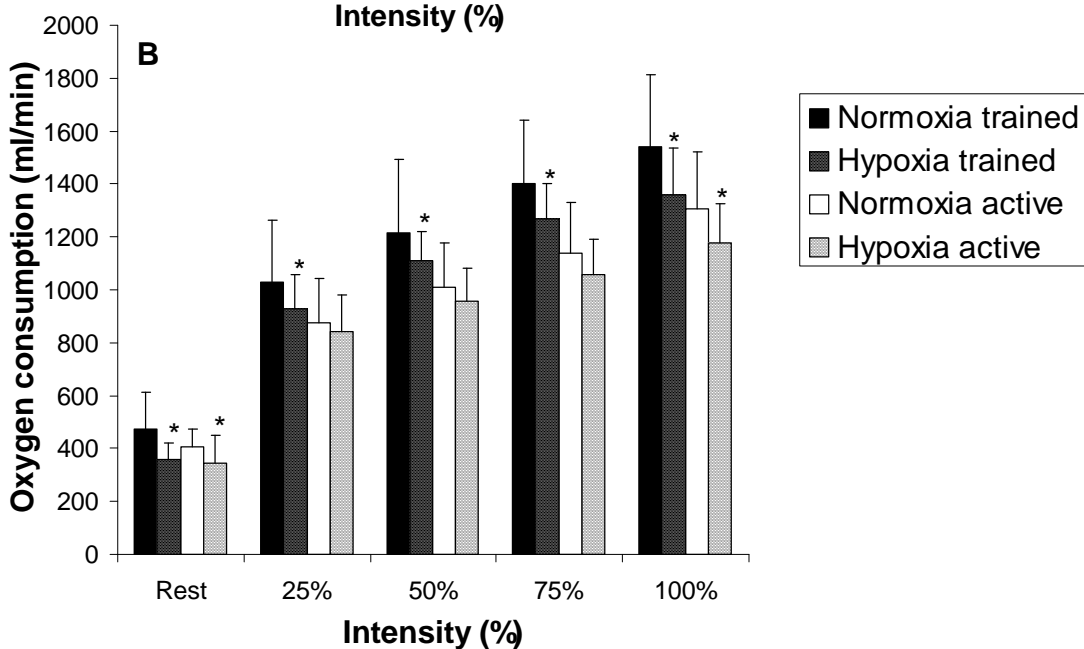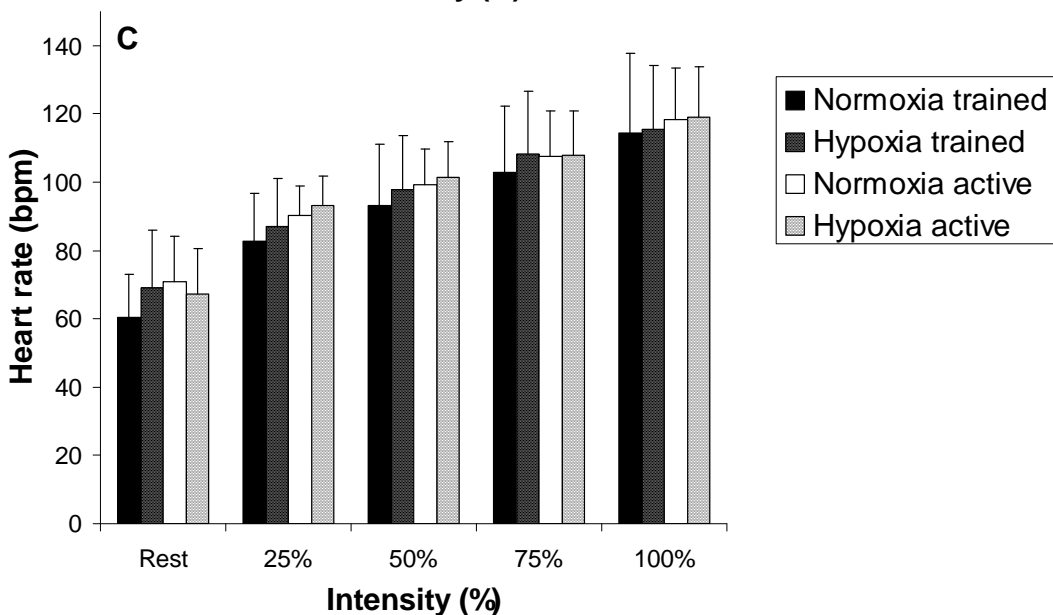

Supplement: 12945_2008_44_MOESM1_ESM.pdf [file 12945_2008_44_MOESM1_ESM.pdf]

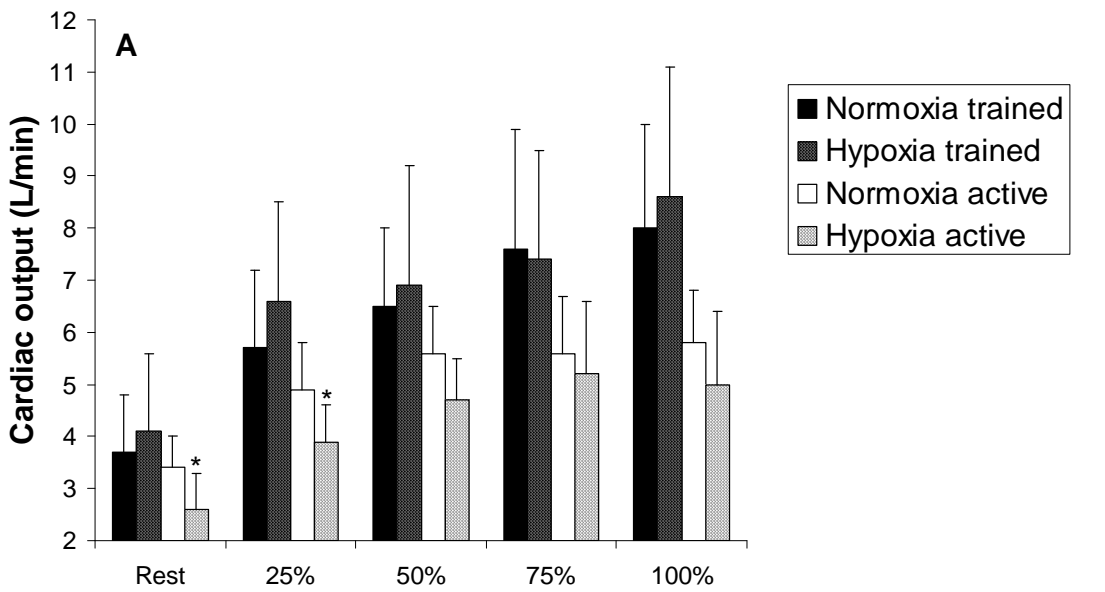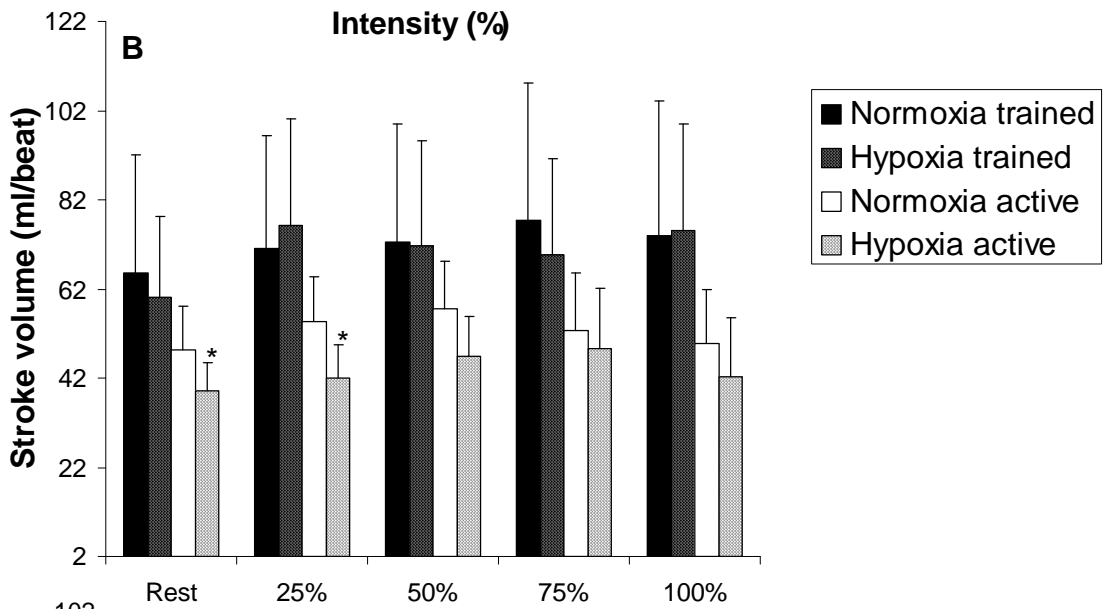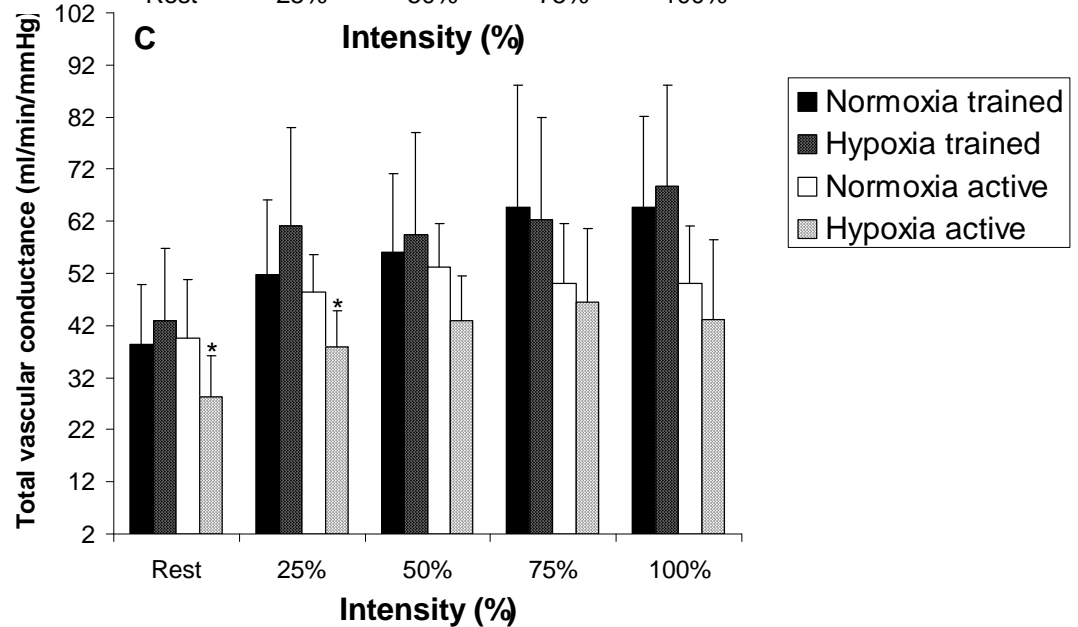

Supplement: 12945_2008_44_MOESM2_ESM.pdf [file 12945_2008_44_MOESM2_ESM.pdf]
